# Supplementary material for: Selecting Normalizers for MicroRNA RT-qPCR Expression Analysis in Murine Preimplantation Embryos and the Associated Conditioned Culture Media
Source: MDPI journal article supplement (doi:10.3390/jdb11020017), 2023-04-04
Supplement: s1 [file s1]

**Table S1:** Dataset characteristics of whole embryo lysate sample set data (raw Ct values) and conditioned media samples (base 2 logarithmic transformations) according to the BestKeeper analytical tool. *Abbr.* CP – crossing point (cycle threshold)

| <i>CP data of housekeeping Genes (Whole Embryo Lysates):</i> |       |        |        |         |         |         |         |
|--------------------------------------------------------------|-------|--------|--------|---------|---------|---------|---------|
|                                                              | U6    | let-7a | miR-16 | miR-26a | miR-103 | miR-106 | miR-191 |
| n                                                            | 7     | 7      | 7      | 7       | 7       | 7       | 7       |
| geo Mean [CP]                                                | 28.58 | 34.37  | 30.50  | 34.92   | 32.36   | 33.01   | 33.45   |
| ar Mean [CP]                                                 | 28.76 | 34.39  | 30.56  | 34.96   | 32.49   | 33.10   | 33.53   |
| min [CP]                                                     | 25.39 | 32.20  | 27.41  | 32.22   | 28.69   | 30.05   | 30.30   |
| max [CP]                                                     | 35.01 | 35.92  | 33.45  | 36.61   | 36.58   | 37.26   | 36.47   |
| std dev [± CP]                                               | 2.89  | 1.08   | 1.64   | 1.43    | 2.58    | 2.07    | 2.17    |
| CV [% CP]                                                    | 10.04 | 3.14   | 5.37   | 4.10    | 7.94    | 6.26    | 6.46    |
| min [x-fold]                                                 | -9.12 | -4.50  | -8.54  | -6.49   | -12.74  | -7.78   | -8.85   |
| max [x-fold]                                                 | 86.32 | 2.93   | 7.72   | 3.21    | 18.64   | 18.99   | 8.11    |
| std dev [± x-fold]                                           | 7.40  | 2.11   | 3.12   | 2.70    | 5.97    | 4.21    | 4.49    |

  

| <i>CP data of housekeeping Genes (Conditioned Media):</i> |       |        |         |         |
|-----------------------------------------------------------|-------|--------|---------|---------|
|                                                           | U6    | miR-16 | miR-103 | miR-106 |
| n                                                         | 6     | 6      | 6       | 6       |
| geo Mean [CP]                                             | 5.50  | 5.31   | 3.92    | 2.91    |
| ar Mean [CP]                                              | 5.57  | 5.44   | 4.24    | 3.16    |
| min [CP]                                                  | 4.05  | 4.06   | 2.62    | 1.96    |
| max [CP]                                                  | 6.41  | 7.50   | 7.17    | 5.07    |
| std dev [± CP]                                            | 0.75  | 1.05   | 1.60    | 1.22    |
| CV [% CP]                                                 | 13.55 | 19.22  | 37.67   | 38.53   |
| min [x-fold]                                              | -2.73 | -2.38  | -2.47   | -1.93   |
| max [x-fold]                                              | 1.88  | 4.57   | 9.56    | 4.47    |
| std dev [± x-fold]                                        | 1.69  | 2.06   | 3.02    | 2.33    |
