# Supplementary material for: Selecting Normalizers for MicroRNA RT-qPCR Expression Analysis in Murine Preimplantation Embryos and the Associated Conditioned Culture Media
Source: MDPI journal article supplement (doi:10.3390/jdb11020017), 2023-04-04
Supplement: s1 [file s1]

**Table S2:** Pearson correlation coefficients describing inter-candidate correlation and correlation with the BestKeeper index, according to the BestKeeper tool for whole embryo lysates and conditioned media sample sets.

| <i>Pearson correlation coefficient, r - Whole Embryo Lysates</i> |                     |       |        |        |         |         |         |         |
|------------------------------------------------------------------|---------------------|-------|--------|--------|---------|---------|---------|---------|
|                                                                  | vs.                 | U6    | let-7a | miR-16 | miR-26a | miR-103 | miR-106 | miR-191 |
|                                                                  | let-7a              | 0.287 | -      | -      | -       | -       | -       | -       |
|                                                                  | p-value             | 0.533 | -      | -      | -       | -       | -       | -       |
|                                                                  | miR-16              | 0.909 | 0.608  | -      | -       | -       | -       | -       |
|                                                                  | p-value             | 0.005 | 0.148  | -      | -       | -       | -       | -       |
|                                                                  | miR-26a             | 0.681 | 0.885  | 0.891  | -       | -       | -       | -       |
|                                                                  | p-value             | 0.092 | 0.008  | 0.007  | -       | -       | -       | -       |
|                                                                  | miR-103             | 0.952 | 0.443  | 0.967  | 0.798   | -       | -       | -       |
|                                                                  | p-value             | 0.001 | 0.321  | 0.001  | 0.032   | -       | -       | -       |
|                                                                  | miR-106             | 0.940 | 0.397  | 0.960  | 0.754   | 0.951   | -       | -       |
|                                                                  | p-value             | 0.002 | 0.377  | 0.001  | 0.050   | 0.001   | -       | -       |
|                                                                  | miR-191             | 0.894 | 0.478  | 0.961  | 0.809   | 0.985   | 0.938   | -       |
|                                                                  | p-value             | 0.007 | 0.277  | 0.001  | 0.027   | 0.001   | 0.002   | -       |
|                                                                  | BestKeeper vs.      | U6    | let-7a | miR-16 | miR-26a | miR-103 | miR-106 | miR-191 |
|                                                                  | coeff. of corr. [r] | 0.941 | 0.547  | 0.994  | 0.865   | 0.987   | 0.965   | 0.973   |
|                                                                  | p-value             | 0.002 | 0.204  | 0.001  | 0.012   | 0.001   | 0.001   | 0.001   |

| <i>Pearson correlation coefficient, r - Conditioned Media</i> |                     |       |        |         |         |
|---------------------------------------------------------------|---------------------|-------|--------|---------|---------|
|                                                               | vs.                 | U6    | miR-16 | miR-103 | miR-106 |
|                                                               | miR-16              | 0.804 | -      | -       | -       |
|                                                               | p-value             | 0.054 | -      | -       | -       |
|                                                               | miR-103             | 0.769 | 0.965  | -       | -       |
|                                                               | p-value             | 0.074 | 0.002  | -       | -       |
|                                                               | miR-106             | 0.678 | 0.861  | 0.948   | -       |
|                                                               | p-value             | 0.138 | 0.028  | 0.004   | -       |
|                                                               |                     |       |        |         |         |
|                                                               | BestKeeper vs.      | U6    | miR-16 | miR-103 | miR-106 |
|                                                               | coeff. of corr. [r] | 0.804 | 0.957  | 0.993   | 0.965   |
|                                                               | p-value             | 0.054 | 0.003  | 0.001   | 0.002   |
