# Supplementary material for: Selecting Normalizers for MicroRNA RT-qPCR Expression Analysis in Murine Preimplantation Embryos and the Associated Conditioned Culture Media
Source: MDPI journal article supplement (doi:10.3390/jdb11020017), 2023-04-04
Supplement: s1 [file s1]

**Table S3:** Regression output describing individual candidate correlation with the BestKeeper index (BK) according to the BestKeeper tool for whole embryo lysates and conditioned media sample sets.

| <i>Regression Analysis: HKG vs. BestKeeper - Whole Embryo Lysates</i> |        |        |        |         |         |         |         |
|-----------------------------------------------------------------------|--------|--------|--------|---------|---------|---------|---------|
|                                                                       | U6     | let-7a | miR-16 | miR-26a | miR-103 | miR-106 | miR-191 |
|                                                                       | vs.    | vs.    | vs.    | vs.     | vs.     | vs.     | vs.     |
|                                                                       | BK     | BK     | BK     | BK      | BK      | BK      | BK      |
| coeff. of corr. [r]                                                   | 0.94   | 0.55   | 0.99   | 0.87    | 0.99    | 0.97    | 0.97    |
| coeff. of det. [r <sup>2</sup> ]                                      | 0.89   | 0.30   | 0.99   | 0.75    | 0.97    | 0.93    | 0.95    |
| intercept [CP]                                                        | -18.92 | 24.08  | 1.02   | 13.62   | -11.39  | -2.79   | -2.05   |
| slope [CP]                                                            | 1.47   | 0.32   | 0.91   | 0.66    | 1.35    | 1.11    | 1.10    |
| SE [CP]                                                               | ±1.315 | ±1.206 | ±0.249 | ±0.948  | ±0.548  | ±0.747  | ±0.644  |
| p-value                                                               | 0.002  | 0.204  | 0.001  | 0.012   | 0.001   | 0.001   | 0.001   |
| Power of HKG [x-fold]                                                 | 2.77   | 1.25   | 1.88   | 1.58    | 2.55    | 2.15    | 2.14    |

| <i>Regression Analysis: HKG vs. BestKeeper - Conditioned Media</i> |        |        |         |         |
|--------------------------------------------------------------------|--------|--------|---------|---------|
|                                                                    | U6     | miR-16 | miR-103 | miR-106 |
|                                                                    | vs.    | vs.    | vs.     | vs.     |
|                                                                    | BK     | BK     | BK      | BK      |
| coeff. of corr. [r]                                                | 0.80   | 0.96   | 0.99    | 0.97    |
| coeff. of det. [r <sup>2</sup> ]                                   | 0.65   | 0.92   | 0.99    | 0.93    |
| intercept [CP]                                                     | 3.17   | 1.43   | -1.81   | -1.30   |
| slope [CP]                                                         | 0.54   | 0.90   | 1.36    | 1.01    |
| SE [CP]                                                            | ±0.623 | ±0.427 | ±0.253  | ±0.427  |
| p-value                                                            | 0.054  | 0.003  | 0.001   | 0.002   |
| Power of HKG [x-fold]                                              | 1.45   | 1.87   | 2.57    | 2.01    |
